# Supplementary material for: An ab initio anharmonic approach to IR, Raman and SFG spectra of the solvated methylammonium ion
Source: Royal Society of Chemistry journal article supplement (doi:10.1039/d1cp04451f), 2021-01-01
Supplement: d1cp04451f1.pdf [file d1cp04451f1.pdf]

# *Ab initio* anharmonic approach to IR, Raman and SFG spectra of solvated methylammonium ion

Chih-Kai Lin,<sup>\*a</sup> Qian-Rui Huang,<sup>b</sup> Michitoshi Hayashi<sup>c</sup> and Jer-Lai Kuo<sup>\*b</sup>

<sup>a</sup> Department of Applied Chemistry, National Yang Ming Chiao Tung University, Hsinchu 30010, Taiwan, ROC. E-mail: ethenel@gmail.com

<sup>b</sup> Institute of Atomic and Molecular Sciences, Academia Sinica, Taipei 10617, Taiwan, ROC.  
E-mail: jlkuo@pub.iams.sinica.edu.tw

<sup>c</sup> Center for Condensed Matter Sciences, National Taiwan University, Taipei 10617, Taiwan, ROC.

## Electronic Supplementary Information

This supporting information gives the Cartesian coordinates of optimized geometries, anharmonic coupling constants, and scaled harmonic IR and Raman spectra of  $\text{CH}_3\text{NH}_3^+\dots\text{X}_3$  clusters investigated in this work. The adequacy of the current level of theory is also discussed.

### A. Harmonic IR and Raman spectra

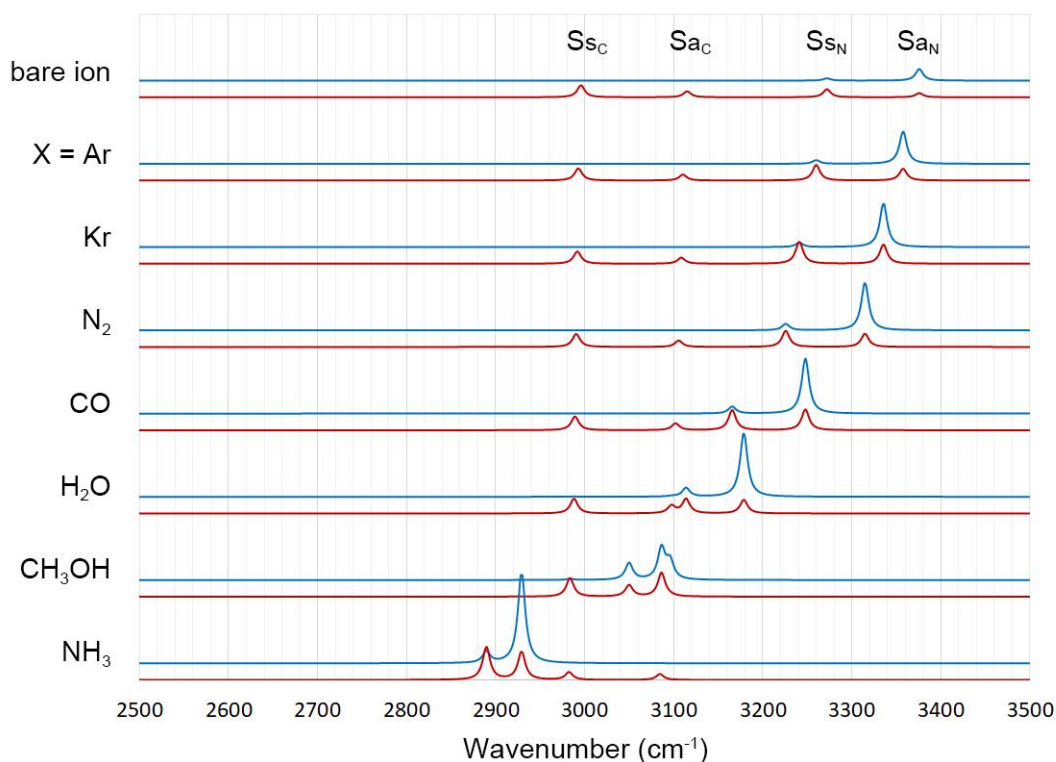

**Figure S1.** Calculated IR (blue traces) and static Raman (red traces) spectra of  $\text{CH}_3\text{NH}_3^+\dots\text{X}_3$  clusters at the MP2/aug-cc-pVDZ level under the harmonic approximation. The frequencies were scaled by a common factor of 0.959. Ss and Sa denote symmetric and asymmetric stretching modes, and subscripts C and N refer to CH and NH groups, respectively.

## B. Adequacy of the current level of theory

In this work, we have carried out the mixed-level scan with the  $n$ -mode representation ( $n$ MR) for the PES. The most essential components of PES were calculated using CCSD/aug-cc-pVDZ up to 2MR and the remaining parts using MP2/aug-cc-pVDZ up to 4MR. Although the experimental data of the triply-solvated methylammonium ion clusters ( $\text{MA-H}^+\dots\text{X}_3$ ) have not been available yet, we have achieved good agreements between experimental and simulated spectra at this level for protonated amine–water clusters and solvated ammonium clusters.<sup>1,2</sup>

We take the methylammonium–water cluster,  $\text{MA-H}^+\dots\text{H}_2\text{O}$ , to test how much a higher level of theory and a larger basis set may improve the simulated results. **Figure S2** shows such a comparison between the IRPD experimental spectrum, the simulated one using CCSD/aug-cc-pVDZ, and the one using DLPNO-CCSD(T)-F12/aug-cc-pVTZ calculated with the ORCA program.<sup>3</sup>

The numbers of the major peaks and their resonance positions calculated by using CCSD/aug-cc-pVDZ are consistent with the experimental result within errors of  $10\text{ cm}^{-1}$  (within  $\sim 0.3\%$ ).<sup>1</sup> Within this accuracy, we conclude that the CCSD/aug-cc-pVDZ level is suitable to construct a vibrational Hamiltonian with our anharmonic algorithm. The DLPNO-CCSD(T)-F12/aug-cc-pVTZ level, on the other hand, predicts peak positions closer to the experimental measurement. Even with this improvement, such a high level is not feasible for us to cope with clusters consisting of more binding partners or heavy atoms such as bromine and iodine studied in this work. Thus, we choose CCSD/aug-cc-pVDZ for this work.

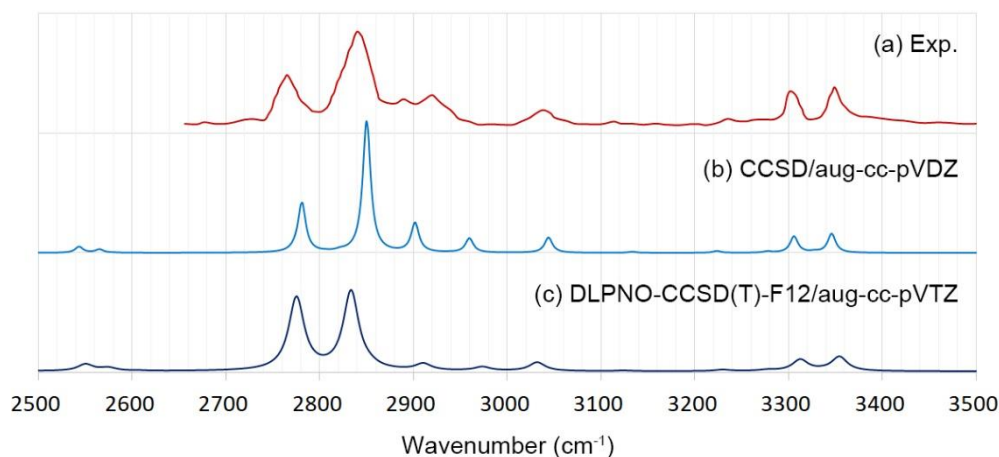

**Figure S2.** Comparison of experimental and simulated IR spectra of the  $\text{MA-H}^+\dots\text{H}_2\text{O}$  cluster.

<sup>1</sup> C.-K. Lin, R. Shishido, Q.-R. Huang, A. Fujii and J.-L. Kuo, Vibrational spectroscopy of protonated amine–water clusters: Tuning Fermi resonance and lighting up dark states, *Phys. Chem. Chem. Phys.*, 2020, **22**, 22035–22046.

<sup>2</sup> C.-K. Lin, Q.-R. Huang and J.-L. Kuo, Anharmonic coupling behind vibrational spectra of solvated ammonium: Lighting up overtone states by Fermi resonance through tuning solvation environments, *Phys. Chem. Chem. Phys.*, 2020, **22**, 24059–24069.

<sup>3</sup> F. Neese, The ORCA program system, *Wiley Interdiscip. Rev.: Comput. Mol. Sci.*, 2012, **2**, 73–78.

### C. Modeling local environments in perovskite

The local environment of the methylammonium ion in the organic–inorganic halide perovskite lattice,  $\text{MAPbX}_3$ , was modeled by gas-phase clusters of solvated methylammonium ions. Comparisons between experimental spectra of perovskite and simulated spectra of cluster models are given below. Results of different solvent types (halide anion vs. hydrogen halide molecule) and different halogen species are shown.

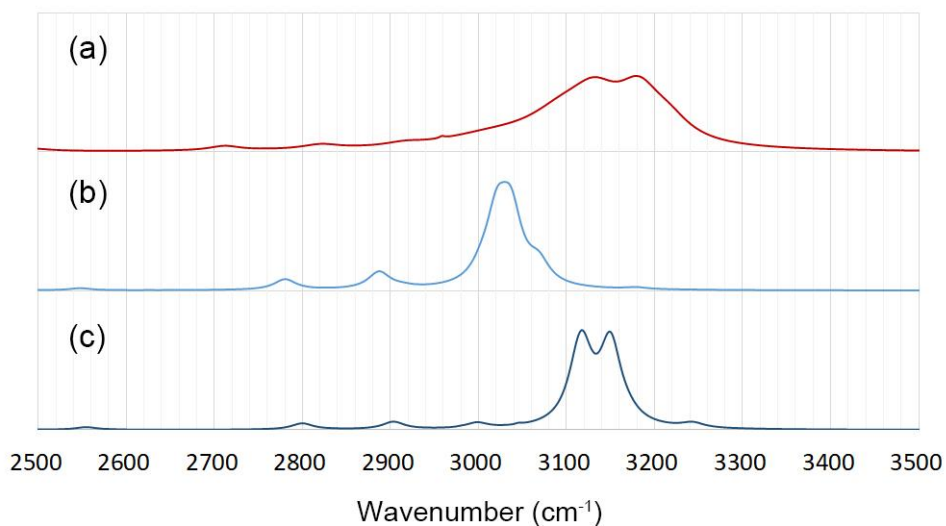

**Figure S3.** Comparison of IR spectra in the NH stretching region: (a) experimental spectrum of perovskite  $\text{MAPbI}_3$  from Ref. 4, (b) simulated spectrum of cluster model  $\text{MA-H}^+\dots(\text{I}^-)_3$ , and (c) simulated spectrum of cluster model  $\text{MA-H}^+\dots(\text{HI})_3$ .

<sup>4</sup> T. Glaser, C. Müller, M. Sendner, C. Krekeler, O. E. Semonin, T. D. Hull, O. Yaffe, J. S. Owen, W. Kowalsky, A. Pucci and R. Lovrinčić, Infrared spectroscopic study of vibrational modes in methylammonium lead halide perovskites, *J. Phys. Chem. Lett.*, 2015, **6**, 2913–2918.

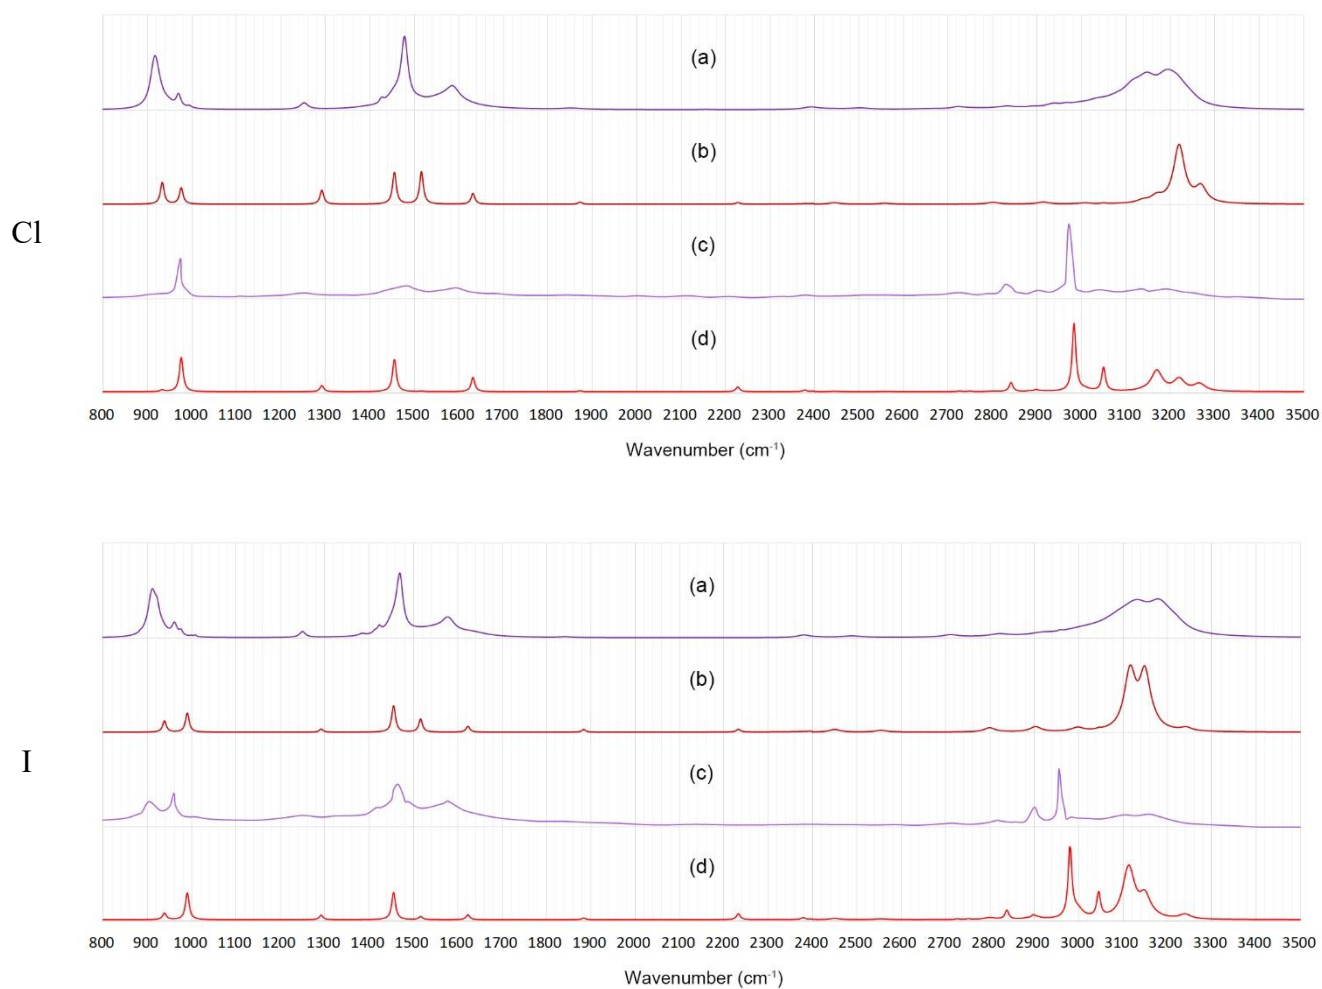

**Figure S4.** Comparison between experimental spectra of perovskite and simulated spectra of gas-phase model clusters with different halogen elements: (a) experimental IR spectrum of  $\text{MAPbX}_3$  perovskite from Ref. 4, (b) simulated IR spectrum of  $\text{MA-H}^+\dots(\text{HX})_3$ , (c) experimental Raman spectrum of  $\text{MAPbX}_3$  perovskite from Ref. 5, and (d) simulated Raman spectrum of  $\text{MA-H}^+\dots(\text{HX})_3$ .

<sup>5</sup> R. G. Niemann, A. G. Kontos, D. Palles, E. I. Kamitsos, A. Kaltzoglou, F. Brivio, P. Falaras and P. J. Cameron, Halogen effects on ordering and bonding of  $\text{CH}_3\text{NH}_3^+$  in  $\text{CH}_3\text{NH}_3\text{PbX}_3$  ( $X = \text{Cl}, \text{Br}, \text{I}$ ) hybrid perovskites: A vibrational spectroscopic study, *J. Phys. Chem. C*, 2016, **120**, 2509–2519.

## D. Cartesian coordinates of model clusters

**Table S1.** Cartesian coordinates of solvated methylammonium species optimized at the MP2/aug-cc-pVDZ level.

### CH<sub>3</sub>NH<sub>3</sub><sup>+</sup>...Ar<sub>3</sub>

|    |             |             |             |
|----|-------------|-------------|-------------|
| N  | 0.00000000  | 0.00000000  | 0.40576196  |
| H  | 0.00000000  | 0.95848077  | 0.03440498  |
| H  | -0.83006869 | -0.47924038 | 0.03440498  |
| H  | 0.83006869  | -0.47924038 | 0.03440498  |
| C  | 0.00000000  | 0.00000000  | 1.91276496  |
| H  | -0.90129996 | 0.52036577  | 2.25470597  |
| H  | 0.00000000  | -1.04073155 | 2.25470597  |
| H  | 0.90129996  | 0.52036577  | 2.25470597  |
| Ar | 0.00000000  | 3.36478478  | -0.39230095 |
| Ar | -2.91398910 | -1.68239239 | -0.39230095 |
| Ar | 2.91398910  | -1.68239239 | -0.39230095 |

### CH<sub>3</sub>NH<sub>3</sub><sup>+</sup>...Kr<sub>3</sub>

|    |             |             |             |
|----|-------------|-------------|-------------|
| N  | 0.00000000  | 0.00000000  | 0.60974872  |
| H  | 0.00000000  | 0.95979042  | 0.23917972  |
| H  | 0.83120288  | -0.47989521 | 0.23917972  |
| H  | -0.83120288 | -0.47989521 | 0.23917972  |
| C  | 0.00000000  | 0.00000000  | 2.11470472  |
| H  | 0.00000000  | -1.04051575 | 2.45768572  |
| H  | 0.90111307  | 0.52025787  | 2.45768572  |
| H  | -0.90111307 | 0.52025787  | 2.45768572  |
| Kr | 0.00000000  | 3.43658199  | -0.23191728 |
| Kr | -2.97616731 | -1.71829100 | -0.23191728 |
| Kr | 2.97616731  | -1.71829100 | -0.23191728 |

### CH<sub>3</sub>NH<sub>3</sub><sup>+</sup>...(N<sub>2</sub>)<sub>3</sub>

|   |             |             |             |
|---|-------------|-------------|-------------|
| N | 0.00000000  | 0.00000000  | 0.50049310  |
| H | 0.00000000  | 0.96184402  | 0.13288410  |
| H | -0.83298135 | -0.48092201 | 0.13288410  |
| H | 0.83298135  | -0.48092201 | 0.13288410  |
| C | 0.00000000  | 0.00000000  | 2.00395110  |
| H | 0.00000000  | -1.03944899 | 2.35010910  |
| H | 0.90018923  | 0.51972449  | 2.35010910  |
| H | -0.90018923 | 0.51972449  | 2.35010910  |
| N | 0.00000000  | 2.99937902  | -0.39080590 |
| N | 0.00000000  | 4.08619302  | -0.70329590 |

|   |             |             |             |
|---|-------------|-------------|-------------|
| N | -2.59753842 | -1.49968951 | -0.39080590 |
| N | -3.53874696 | -2.04309651 | -0.70329590 |
| N | 2.59753842  | -1.49968951 | -0.39080590 |
| N | 3.53874696  | -2.04309651 | -0.70329590 |

CH<sub>3</sub>NH<sub>3</sub><sup>+</sup>...(CO)<sub>3</sub>

|   |             |             |             |
|---|-------------|-------------|-------------|
| N | 0.00000000  | 0.00000000  | 0.53962603  |
| H | 0.00000000  | 0.96588014  | 0.17377401  |
| H | -0.83647673 | -0.48294007 | 0.17377401  |
| H | 0.83647673  | -0.48294007 | 0.17377401  |
| C | 0.00000000  | 0.00000000  | 2.03963103  |
| H | 0.00000000  | -1.03852781 | 2.38915006  |
| H | 0.89939147  | 0.51926391  | 2.38915006  |
| H | -0.89939147 | 0.51926391  | 2.38915006  |
| C | 0.00000000  | 3.05412012  | -0.38004304 |
| O | 0.00000000  | 4.15317111  | -0.70263207 |
| C | -2.64494561 | -1.52706006 | -0.38004304 |
| O | -3.59675169 | -2.07658556 | -0.70263207 |
| C | 2.64494561  | -1.52706006 | -0.38004304 |
| O | 3.59675169  | -2.07658556 | -0.70263207 |

CH<sub>3</sub>NH<sub>3</sub><sup>+</sup>...(H<sub>2</sub>O)<sub>3</sub>

|   |             |             |             |
|---|-------------|-------------|-------------|
| N | 0.00000000  | 0.00000000  | 0.25224110  |
| H | 0.12501171  | 0.96330656  | -0.10845584 |
| H | 0.77174209  | -0.58991660 | -0.10845584 |
| H | -0.89675381 | -0.37338996 | -0.10845584 |
| C | 0.00000000  | 0.00000000  | 1.74626310  |
| H | 0.97047116  | 0.36510470  | 2.10096314  |
| H | -0.16904564 | -1.02300503 | 2.10096314  |
| H | -0.80142552 | 0.65790033  | 2.10096314  |
| O | 0.30075976  | 2.70147235  | -0.57184073 |
| H | 0.93368957  | 3.35659750  | -0.24692968 |
| H | -0.20480413 | 3.16767476  | -1.25193872 |
| O | 2.18916380  | -1.61120176 | -0.57184073 |
| H | 2.84568888  | -1.40647180 | -1.25193872 |
| H | 2.44005392  | -2.48689764 | -0.24692968 |
| O | -2.48992356 | -1.09027058 | -0.57184073 |
| H | -3.37374350 | -0.86969986 | -0.24692968 |
| H | -2.64088475 | -1.76120296 | -1.25193872 |

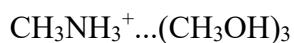

|   |             |             |             |
|---|-------------|-------------|-------------|
| N | 0.00000000  | 0.00000000  | 1.26002610  |
| H | 0.41088269  | 0.87319110  | 0.87065608  |
| H | -0.96164702 | -0.08076070 | 0.87065608  |
| H | 0.55076433  | -0.79243040 | 0.87065608  |
| C | 0.00000000  | 0.00000000  | 2.75053810  |
| H | 1.03289770  | 0.07700933  | 3.10937407  |
| H | -0.58314089 | 0.85601098  | 3.10937407  |
| H | -0.44975681 | -0.93302031 | 3.10937407  |
| O | 1.00506288  | 2.16171438  | -0.16979196 |
| H | 1.68282097  | 2.83354077  | -0.01141698 |
| C | 0.06162597  | 2.67638863  | -1.14719493 |
| H | -0.71886317 | 1.91150489  | -1.25198690 |
| H | -0.39184788 | 3.61530410  | -0.79972793 |
| H | 0.55565977  | 2.83111303  | -2.11653095 |
| O | -2.37463101 | -0.21044720 | -0.16979196 |
| H | -3.29532877 | 0.04059532  | -0.01141698 |
| C | -2.34863353 | -1.28482466 | -1.14719493 |
| H | -2.72964568 | -0.93434104 | -2.11653095 |
| H | -1.29598021 | -1.57830621 | -1.25198690 |
| H | -2.93502125 | -2.14700226 | -0.79972793 |
| O | 1.36956813  | -1.95126717 | -0.16979196 |
| H | 1.61250780  | -2.87413609 | -0.01141698 |
| C | 2.28700756  | -1.39156397 | -1.14719493 |
| H | 2.17398592  | -1.89677199 | -2.11653095 |
| H | 2.01484338  | -0.33319868 | -1.25198690 |
| H | 3.32686913  | -1.46830183 | -0.79972793 |

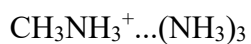

|   |             |             |             |
|---|-------------|-------------|-------------|
| N | 0.00000000  | 0.00000000  | 0.25834090  |
| H | 0.00181060  | 0.98670581  | -0.09792310 |
| H | -0.85541760 | -0.49178488 | -0.09792310 |
| H | 0.85360700  | -0.49492093 | -0.09792310 |
| C | 0.00000000  | 0.00000000  | 1.74737090  |
| H | -0.89997752 | 0.51094962  | 2.11030590  |
| H | 0.00749341  | -1.03487820 | 2.11030590  |
| H | 0.89248411  | 0.52392858  | 2.11030590  |
| N | 0.01140315  | 2.79984478  | -0.57794610 |
| H | -0.52434089 | 3.40199573  | 0.05053790  |
| H | -0.38246106 | 2.96166623  | -1.50698710 |
| H | 0.94802409  | 3.20772154  | -0.60784810 |

|   |             |             |             |
|---|-------------|-------------|-------------|
| N | -2.43043828 | -1.39004698 | -0.57794610 |
| H | -2.68404428 | -2.15509039 | 0.05053790  |
| H | -2.37364766 | -1.81205411 | -1.50698710 |
| H | -3.25198039 | -0.78284782 | -0.60784810 |
| N | 2.41903513  | -1.40979780 | -0.57794610 |
| H | 2.30395629  | -2.42487372 | -0.60784810 |
| H | 3.20838517  | -1.24690533 | 0.05053790  |
| H | 2.75610872  | -1.14961212 | -1.50698710 |

CH<sub>3</sub>NH<sub>3</sub><sup>+</sup>...(HCl)<sub>3</sub>

|    |             |             |             |
|----|-------------|-------------|-------------|
| N  | 0.00000000  | 0.00000000  | 0.32849881  |
| H  | -0.07161297 | 0.96230858  | -0.03662619 |
| H  | -0.79757719 | -0.54317294 | -0.03662619 |
| H  | 0.86919017  | -0.41913564 | -0.03662619 |
| C  | 0.00000000  | 0.00000000  | 1.83003981  |
| H  | 0.05547212  | -1.03802539 | 2.17637981  |
| H  | 0.87122030  | 0.56705296  | 2.17637981  |
| H  | -0.92669242 | 0.47097243  | 2.17637981  |
| Cl | -0.05266536 | 3.28097334  | -0.31700219 |
| H  | -0.97822321 | 3.55329251  | -1.17729319 |
| Cl | -2.81507358 | -1.68609621 | -0.31700219 |
| H  | -2.58812997 | -2.62381241 | -1.17729319 |
| Cl | 2.86773894  | -1.59487713 | -0.31700219 |
| H  | 3.56635319  | -0.92948010 | -1.17729319 |

CH<sub>3</sub>NH<sub>3</sub><sup>+</sup>...(HBr)<sub>3</sub>

|    |             |             |             |
|----|-------------|-------------|-------------|
| N  | 0.00000000  | 0.00000000  | 0.60175139  |
| H  | 0.89104392  | -0.37233892 | 0.23468039  |
| H  | -0.12306699 | 0.95783613  | 0.23468039  |
| H  | -0.76797693 | -0.58549721 | 0.23468039  |
| C  | 0.00000000  | 0.00000000  | 2.10144739  |
| H  | -0.96769001 | 0.37920147  | 2.44879239  |
| H  | 0.15544690  | -1.02764487 | 2.44879239  |
| H  | 0.81224311  | 0.64844340  | 2.44879239  |
| Br | 3.14623276  | -1.20889309 | -0.20354661 |
| H  | 2.85024383  | -2.21661928 | -1.16632261 |
| Br | -0.52618426 | 3.32916404  | -0.20354661 |
| H  | 0.49452669  | 3.57669320  | -1.16632261 |
| Br | -2.62004851 | -2.12027095 | -0.20354661 |
| H  | -3.34477052 | -1.36007393 | -1.16632261 |



CH<sub>3</sub>NH<sub>3</sub><sup>+</sup>...(HI)<sub>3</sub>

|   |             |             |             |
|---|-------------|-------------|-------------|
| N | 0.00000000  | 0.00000000  | 0.90761446  |
| H | -0.01587807 | 0.96627048  | 0.53598745  |
| H | -0.82887575 | -0.49688606 | 0.53598745  |
| H | 0.84475382  | -0.46938443 | 0.53598745  |
| C | 0.00000000  | 0.00000000  | 2.40455246  |
| H | -0.01413168 | -1.03898254 | 2.75325947  |
| H | 0.90685112  | 0.50725288  | 2.75325947  |
| H | -0.89271944 | 0.53172966  | 2.75325947  |
| I | -0.07790542 | 3.46621591  | -0.16868957 |
| H | -1.22404506 | 3.21050863  | -1.27557357 |
| I | -2.96287833 | -1.80057603 | -0.16868957 |
| H | -2.16835950 | -2.66530843 | -1.27557357 |
| I | 3.04078375  | -1.66563989 | -0.16868957 |
| H | 3.39240456  | -0.54520020 | -1.27557357 |

## E. Anharmonic coupling constants of model clusters

**Table S2.** Original peak positions of vibrational quantum states and the anharmonic coupling constants between relevant states (both in  $\text{cm}^{-1}$ ) involved in Fermi resonance associated with NH modes in  $\text{MA-H}^+ \dots \text{X}_3$  clusters.<sup>a</sup>

|                                                     |                       | rr/rr'/r'r' |      |      |      |      |      |      |      |      | ru <sub>N</sub> /r'u <sub>N</sub> |      |      |      | rx <sub>N</sub> /r'x <sub>N</sub> |      |      |      |      |      | u <sub>N</sub> u <sub>N</sub> | u <sub>N</sub> x <sub>N</sub> | x <sub>N</sub> x <sub>N</sub> |      |      | IR <sup>b</sup> |      |      |      |     |
|-----------------------------------------------------|-----------------------|-------------|------|------|------|------|------|------|------|------|-----------------------------------|------|------|------|-----------------------------------|------|------|------|------|------|-------------------------------|-------------------------------|-------------------------------|------|------|-----------------|------|------|------|-----|
|                                                     |                       | 1863        | 1865 | 1878 | 2216 | 2228 | 2229 | 2240 | 2585 | 2586 | 2589                              | 2472 | 2472 | 2826 | 2826                              | 2557 | 2556 | 2920 | 2920 | 2556 | 2557                          | 2920                          | 2920                          | 3058 | 3153 | 3153            | 3250 | 3254 | 3255 |     |
| MA-H <sup>+</sup>                                   | S <sub>sN</sub> 3227  | 0           | 0    | -87  | 0    | 0    | 0    | -86  | 0    | 0    | 39                                | 0    | 0    | 0    | 0                                 | 0    | -1   | -1   | 3    | -1   | 0                             | 3                             | 0                             | 47   | 0    | 0               | -26  | 0    | 0    | 58  |
|                                                     | S <sub>aN</sub> 3302  | -20         | 28   | 0    | 0    | 17   | 24   | 0    | -6   | 9    | 0                                 | 51   | 58   | -42  | -28                               | 29   | 31   | -26  | -15  | -31  | 30                            | 16                            | -26                           | 0    | 2    | 12              | 0    | 5    | -20  | 132 |
|                                                     | S <sub>aN'</sub> 3302 | 28          | 20   | 0    | 0    | -24  | 17   | 0    | 9    | 6    | 0                                 | 58   | -50  | -28  | 41                                | -30  | 29   | 15   | -26  | -29  | -31                           | 26                            | 15                            | 0    | -11  | 2               | 0    | -21  | -5   | 132 |
| MA-H <sup>+</sup> ...Ar <sub>3</sub>                |                       | 1893        | 1894 | 1906 | 2239 | 2251 | 2252 | 2263 | 2600 | 2601 | 2604                              | 2492 | 2493 | 2841 | 2841                              | 2582 | 2580 | 2937 | 2937 | 2580 | 2582                          | 2937                          | 2937                          | 3071 | 3169 | 3169            | 3268 | 3272 | 3273 |     |
|                                                     | S <sub>sN</sub> 3225  | 0           | 0    | -80  | 0    | 0    | 0    | -86  | 0    | 0    | -43                               | 0    | 0    | 0    | 0                                 | 0    | 0    | -2   | 2    | 0    | 0                             | -2                            | -2                            | -46  | 0    | 0               | 26   | 0    | 0    | 93  |
|                                                     | S <sub>aN</sub> 3292  | -30         | 5    | 0    | 0    | 28   | 4    | 0    | 11   | -2   | 0                                 | -57  | -47  | -13  | -50                               | 1    | -41  | 19   | -25  | -41  | -2                            | -25                           | -19                           | 0    | 7    | -10             | 0    | 19   | -8   | 366 |
| S <sub>aN'</sub> 3292                               | 5                     | 31          | 0    | 0    | -4   | 28   | 0    | -2   | -12  | 0    | -47                               | 57   | -51  | 14   | 42                                | 1    | 25   | 19   | 1    | -42  | 19                            | -25                           | 0                             | -10  | -7   | 1               | -8   | -19  | 366  |     |
| MA-H <sup>+</sup> ...Kr <sub>3</sub>                |                       | 1900        | 1902 | 1913 | 2245 | 2256 | 2257 | 2269 | 2604 | 2605 | 2608                              | 2495 | 2495 | 2842 | 2842                              | 2584 | 2583 | 2938 | 2938 | 2583 | 2584                          | 2938                          | 2938                          | 3069 | 3167 | 3167            | 3265 | 3269 | 3270 |     |
|                                                     | S <sub>sN</sub> 3206  | 0           | 0    | 78   | 0    | 0    | 0    | 85   | 0    | 0    | -43                               | 0    | 0    | 0    | 0                                 | 0    | 0    | -1   | -2   | 0    | 0                             | 2                             | -1                            | -45  | 0    | 0               | 25   | 0    | 1    | 106 |
|                                                     | S <sub>aN</sub> 3268  | -29         | 0    | 0    | 0    | 27   | 0    | 0    | 11   | 0    | 0                                 | 33   | -64  | 16   | 49                                | -31  | -26  | 31   | -3   | -26  | 32                            | -3                            | -32                           | 0    | 11   | 1               | 0    | 20   | 0    | 488 |
| S <sub>aN'</sub> 3269                               | 0                     | 30          | 0    | 0    | 0    | 28   | 0    | 0    | 11   | 0    | 65                                | 33   | -50  | 16   | -26                               | 32   | -3   | -32  | 32   | 26   | -32                           | 3                             | 0                             | -1   | 12   | 1               | 0    | -20  | 488  |     |
| MA-H <sup>+</sup> ...(N <sub>2</sub> ) <sub>3</sub> |                       | 1941        | 1942 | 1953 | 2276 | 2287 | 2288 | 2299 | 2625 | 2625 | 2628                              | 2535 | 2535 | 2875 | 2875                              | 2627 | 2626 | 2970 | 2971 | 2626 | 2627                          | 2970                          | 2970                          | 3112 | 3211 | 3211            | 3310 | 3314 | 3315 |     |
|                                                     | S <sub>sN</sub> 3200  | 0           | 0    | 72   | 0    | 0    | 0    | 86   | 0    | 0    | 49                                | 0    | 0    | 0    | 0                                 | 0    | 1    | -2   | -1   | 1    | 0                             | 1                             | -2                            | 46   | 0    | 0               | -25  | 0    | -1   | 158 |
|                                                     | S <sub>aN</sub> 3256  | -25         | -9   | 0    | 0    | 26   | -10  | 0    | 12   | 5    | 0                                 | 68   | 12   | -10  | 54                                | -35  | -18  | -4   | -34  | 18   | -34                           | -33                           | 4                             | 0    | 12   | -5              | 0    | -20  | -1   | 555 |
| S <sub>aN'</sub> 3257                               | 9                     | -26         | 0    | 0    | -10  | -26  | 0    | -5   | 12   | 0    | -12                               | 69   | 55   | 11   | -19                               | 35   | 34   | -4   | -35  | -18  | -4                            | -34                           | 0                             | 5    | 12   | -1              | -1   | 20   | 555  |     |
| MA-H <sup>+</sup> ...(CO) <sub>3</sub>              |                       | 1969        | 1970 | 1980 | 2299 | 2310 | 2310 | 2321 | 2643 | 2643 | 2646                              | 2557 | 2557 | 2893 | 2893                              | 2646 | 2646 | 2985 | 2985 | 2646 | 2646                          | 2985                          | 2985                          | 3132 | 3227 | 3227            | 3321 | 3326 | 3327 |     |
|                                                     | S <sub>sN</sub> 3132  | 0           | 0    | -65  | 0    | 0    | 0    | 83   | 0    | 0    | 52                                | 0    | 0    | 0    | 0                                 | -1   | -1   | 0    | -2   | -1   | 1                             | 2                             | 0                             | 43   | 0    | 0               | -23  | 0    | 0    | 185 |
|                                                     | S <sub>aN</sub> 3180  | 24          | 0    | 0    | 0    | 26   | 0    | 0    | -13  | 0    | 0                                 | 52   | 39   | 1    | -56                               | 25   | -26  | 34   | -4   | 27   | 26                            | -3                            | -35                           | 0    | 11   | -1              | 0    | -18  | -1   | 682 |
| S <sub>aN'</sub> 3180                               | 0                     | -25         | 0    | 0    | 0    | -27  | 0    | 0    | -13  | 0    | 39                                | -53  | 57   | 1    | 27                                | 26   | -3   | -35  | -26  | 27   | -35                           | 4                             | 0                             | 2    | 12   | -1              | -1   | 18   | 682  |     |

**Table S2. (continued)**

|                                                        |                                       | rr/r'r'/r'r' |      |      |      |      |      |      |      |      | ru <sub>N</sub> /r'u <sub>N</sub> |      |      |      | rx <sub>N</sub> /r'x <sub>N</sub> |      |      |      |      |      | u <sub>N</sub> u <sub>N</sub> |      | x <sub>N</sub> x <sub>N</sub> |      |      | IR <sup>b</sup> |      |      |      |      |
|--------------------------------------------------------|---------------------------------------|--------------|------|------|------|------|------|------|------|------|-----------------------------------|------|------|------|-----------------------------------|------|------|------|------|------|-------------------------------|------|-------------------------------|------|------|-----------------|------|------|------|------|
|                                                        |                                       | 2015         | 2016 | 2025 | 2341 | 2350 | 2351 | 2361 | 2679 | 2680 | 2682                              | 2605 | 2605 | 2939 | 2939                              | 2689 | 2689 | 3024 | 3024 | 2689 | 2689                          | 3024 | 3024                          | 3186 | 3274 |                 | 3274 | 3362 | 3366 | 3367 |
| MA-H <sup>+</sup> ...(H <sub>2</sub> O) <sub>3</sub>   | s <sub>SN</sub> 3076                  | 0            | 0    | -55  | 0    | 0    | 0    | 79   | 0    | 0    | -56                               | 0    | 0    | 0    | 1                                 | 2    | 4    | -2   | 3    | 4    | -2                            | 3    | 2                             | 42   | 0    | 0               | -22  | 0    | 0    | 290  |
|                                                        | s <sub>aN</sub> 3103                  | -9           | 18   | 0    | 0    | -12  | -21  | 0    | -7   | -11  | 0                                 | 33   | 49   | -52  | 24                                | -30  | 14   | -10  | -35  | -14  | -30                           | 34   | -10                           | 0    | 11   | -7              | 0    | 16   | -7   | 942  |
|                                                        | s <sub>aN'</sub> 3103                 | 18           | 9    | 0    | 0    | 21   | -12  | 0    | 11   | -7   | 0                                 | -49  | 32   | -24  | -52                               | 15   | 31   | -35  | 11   | -30  | 15                            | -11  | -34                           | 0    | 6    | 12              | 0    | 8    | 16   | 941  |
| MA-H <sup>+</sup> ...(CH <sub>3</sub> OH) <sub>3</sub> |                                       | 2018         | 2018 | 2028 | 2327 | 2337 | 2338 | 2348 | 2649 | 2649 | 2652                              | 2647 | 2647 | 2964 | 2964                              | 2696 | 2696 | 3014 | 3015 | 2696 | 2696                          | 3015 | 3014                          | 3267 | 3320 | 3320            | 3374 | 3378 | 3378 |      |
|                                                        | s <sub>SN</sub> 3005                  | 0            | -1   | 55   | 0    | 0    | -1   | 76   | 0    | 0    | -52                               | 1    | 1    | -1   | -1                                | -4   | 1    | -3   | 1    | -3   | -5                            | 1    | 5                             | 38   | 0    | -1              | -21  | 0    | 0    | 698  |
|                                                        | s <sub>aN</sub> 3008                  | -11          | -16  | -2   | 0    | 13   | -17  | -2   | 6    | 8    | 1                                 | 12   | 56   | -50  | -18                               | -10  | -33  | 33   | 15   | -33  | 10                            | -15  | 32                            | -1   | -5   | -12             | 0    | -9   | 13   | 860  |
| s <sub>aN'</sub> 3008                                  | -16                                   | 11           | 1    | 0    | 16   | 13   | 1    | 8    | -6   | -1   | -55                               | 12   | -18  | 49   | -33                               | 10   | -15  | 32   | 10   | 32   | -32                           | -14  | 1                             | -11  | 5    | 0               | -13  | -9   | 860  |      |
| MA-H <sup>+</sup> ...(NH <sub>3</sub> ) <sub>3</sub>   |                                       | 2078         | 2079 | 2088 | 2408 | 2416 | 2416 | 2423 | 2751 | 2751 | 2754                              | 2661 | 2661 | 3003 | 3003                              | 2735 | 2736 | 3075 | 3075 | 2736 | 2735                          | 3075 | 3075                          | 3242 | 3317 | 3317            | 3393 | 3397 | 3398 |      |
|                                                        | s <sub>aN</sub> /s <sub>SN</sub> 2811 | -1           | -11  | 22   | 0    | 3    | -15  | -40  | -3   | 9    | 36                                | -28  | 25   | 45   | -2                                | -20  | 13   | 30   | 2    | -12  | -15                           | -1   | 28                            | 21   | -4   | -5              | -9   | 0    | 10   | 1134 |
|                                                        | s <sub>aN'</sub> 2806                 | -13          | 0    | -5   | 0    | 19   | 2    | 9    | -11  | -2   | -8                                | -34  | -30  | 9    | 55                                | 14   | 23   | 6    | -35  | -23  | 13                            | 35   | 6                             | -4   | -7   | 4               | 2    | 12   | 2    | 1525 |
| s <sub>SN</sub> /s <sub>aN</sub> 2815                  | -1                                    | 8            | 29   | 0    | 1    | 12   | -53  | 0    | -7   | 47   | 16                                | -24  | -33  | 10   | 12                                | -5   | -20  | -6   | 7    | 19   | 7                             | -23  | 27                            | 2    | 5    | -12             | 2    | -7   | 832  |      |

<sup>a</sup> Notations of states: s<sub>SN</sub> and s<sub>aN</sub>, symmetric and asymmetric N–H stretching; r and r', CH<sub>3</sub>–NH<sub>3</sub> rocking; u<sub>N</sub>, NH<sub>3</sub> umbrella; x<sub>N</sub>, H–N–H scissoring.

<sup>b</sup> The original IR intensities (in km mol<sup>-1</sup>) of the NH stretching modes.
